# Supplementary material for: Influence of probe geometry on measurement results of non-ideal thermal conductivity sensors
Source: Copernicus journal article supplement (doi:10.5194/gi-5-383-2016), 2016-09-06
Supplement: Supplementary file 1 [file gi-5-383-2016-supplement.zip]

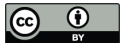

## *Supplement of*

# **Influence of probe geometry on measurement results of non-ideal thermal conductivity sensors**

**Patrick Tiefenbacher et al.**

*Correspondence to:* Patrick Tiefenbacher ([patrick.tiefenbacher@oeaw.ac.at](mailto:patrick.tiefenbacher@oeaw.ac.at))

- [gi-5-383-2016-supplement-title-page.pdf](#)
- [supplement\\_measurement\\_data](#)
  - LNP03
    - \* Agar
    - \* Glassbeads\_0.5mm
    - \* Kerafol\_KP96
    - \* PE
    - \* Waterice
  - LNP04
    - \* Agar
    - \* Glassbeads\_0.5mm
    - \* Kerafol\_KP96
    - \* PE
    - \* Waterice
  - TP02
    - \* Agar
    - \* Glassbeads\_0.5mm
    - \* Glassbeads\_1mm
    - \* Glassbeads\_4mm
    - \* Kerafol\_KP96
    - \* PE
    - \* Waterice

The copyright of individual parts of the supplement might differ from the CC-BY 3.0 licence.
